# Supplementary material for: Allosteric mechanism of the V. vulnificus adenine riboswitch resolved by four-dimensional chemical mapping
Source: eLife journal article supplement (doi:10.7554/elife.29602), 2018-02-15
Supplement: supp [file elife-29602-supp-v1.zip]

Archive with 18 entries (18 files):
- elife_poa_e29602_Figure_5_figure_supplement_2.ai
- elife_poa_e29602_Figure_1_figure_supplement_3.ai
- elife_poa_e29602_Figure_6_figure_supplement_2.ai
- elife_poa_e29602_Figure_8_figure_supplement_2.ai
- elife_poa_e29602_Figure_1_figure_supplement_2.ai
- elife_poa_e29602_Figure_8_figure_supplement_1.ai
- elife_poa_e29602_Appendix_Figure_2.ai
- elife_poa_e29602_Figure_6_figure_supplement_1.ai
- elife_poa_e29602_Appendix_Figure_1.ai
- elife_poa_e29602_Figure_5_figure_supplement_1.ai
- elife_poa_e29602_Figure_8_figure_supplement_3.ai
- elife_poa_e29602_Figure_1_figure_supplement_1.ai
- elife_poa_e29602_Figure_2_figure_supplement_1.ai
- elife_poa_e29602_Transparent_Reporting_File.pdf
- elife_poa_e29602_Figure_7_figure_supplement_1.ai
- elife_poa_e29602_Figure_3_figure_supplement_1.ai
- elife_poa_e29602_Figure_3_figure_supplement_2.ai
- elife_poa_e29602_Appendix_Figure_3.ai
